# Supplementary material for: Tailoring the photocatalytic activity of layered perovskites by opening the interlayer vacancy via ion-exchange reactions
Source: Royal Society of Chemistry journal article supplement (doi:10.1039/c5ce01582k), 2015-01-01
Supplement: c5ce01582k1.pdf [file c5ce01582k1.pdf]

## Supporting Information

### **Tailoring the Photocatalytic Activity of Layered Perovskites by Opening the Interlayer Vacancy *via* Ion-exchange Reactions**

*Yingqi Wang,<sup>ab</sup> Xiaofang Lai,<sup>b</sup> Xujie Lü,<sup>\*c</sup> Yanting Li,<sup>d</sup> Qinglong Liu,<sup>b</sup> Jianhua Lin,<sup>b</sup> and Fuqiang Huang<sup>\*bc</sup>*

<sup>a</sup> Department of Materials Science and Engineering, College of Engineering, Peking University, Beijing 100871, P. R. China

<sup>b</sup> Beijing National Laboratory for Molecular Sciences and State Key Laboratory of Rare Earth Materials Chemistry and Applications, College of Chemistry and Molecular Engineering, Peking University, 202 Chengfu Road, Beijing 100871, P. R. China. E-mail: [huangfq@pku.edu.cn](mailto:huangfq@pku.edu.cn)

<sup>c</sup> CAS Key Laboratory of Materials for Energy Conversion, Shanghai Institute of Ceramics, Chinese Academy of Sciences, 1295 Dingxi Road, Shanghai 200050, P. R. China. E-mail: [mselxj@gmail.com](mailto:mselxj@gmail.com)

<sup>d</sup> School of Materials Science and Engineering, Shijiazhuang Tiedao University, Shijiazhuang 050043, China

#### **Synthesis of $K_2La_2Ti_3O_{10}$**

Typically,  $Ti(OC_4H_9)_4$  (6.81 g, 20 mmol) was first dissolved in the mixture of MeOH (51 g, 1.6 mol), ethylene glycol (EG) (50 g, 0.8 mol) and citric acid (CA) (38 g, 0.2 mol) was subsequently added with continuous stirring. After complete dissolution was achieved, excessive  $KNO_3$  was added. The amount of  $KNO_3$  was twice excess (2.70 g, 26.7 mmol) in order to compensate for the loss of potassium by volatilization. The mixture was stirred at room temperature until it became transparent.  $La(NO_3)_3 \cdot 6H_2O$  (5.77 g, 13.3 mmol) was added and the solution was stirred at 323 K for a few minutes. The obtained transparent solution was heated at 403 K with continuous stirring. There was no formation of visible precipitation during the polymerization. The mixture of K, La, and Ti cations was considered to remain as molecularly homogeneous. After heating, the brown resin was calcined in an electric furnace at 673 K for a

few hours, it became a black powder. The black powder precursor was calcined at 1173K for 2h in air.

### **Ni-Loading of photocatalytic hydrogen evolution sample**

Ni-loaded samples were used for photocatalytic hydrogen evolution test. Ni was loaded by impregnation powder samples with an aqueous  $\text{Ni}(\text{NO}_3)_2$  solution (2 atom% of Ni) followed by heating in the air at 573 K for 20 min. The Ni-loaded catalysts were activated by  $\text{H}_2$  reduction at 773K for 2 h and subsequent reoxidation by air at 473 K for 20 min.

### **Profile fitting and least-square refinement of PXRD patterns**

The PXRD pattern index, profile fitting and least-square refinements were carried out using the computer program TOPAS 4.0. All of the reflections could be assigned to orthorhombic symmetry, compared to the tetragonal symmetry of  $\text{K}_2\text{La}_2\text{Ti}_3\text{O}_{10}$ . All peaks in the powder XRD pattern  $\text{BaLa}_2\text{Ti}_3\text{O}_{10}$  and  $\text{SrLa}_2\text{Ti}_3\text{O}_{10}$  can be well indexed to the space group  $C222$ , and  $\text{Ca}_{1-x}\text{K}_x\text{La}_2\text{Ti}_3\text{O}_{10}$  can be indexed to the space group  $Pnmm$ . Cell parameters were listed in Table S2. Figure S1 show the cell volume as a function of ionic radius of  $M$  or the exchange ratio  $x$ .

**Table S1** Selected Bond Lengths (Å) of  $\text{CaLa}_2\text{Ti}_3\text{O}_{10}$  and  $\text{BaLa}_2\text{Ti}_3\text{O}_{10}$ 

| <b><math>\text{CaLa}_2\text{Ti}_3\text{O}_{10}</math></b> |           | <b><math>\text{BaLa}_2\text{Ti}_3\text{O}_{10}</math></b> |           |
|-----------------------------------------------------------|-----------|-----------------------------------------------------------|-----------|
| Ti1-O1                                                    | 2 × 1.919 | Ti1-O5                                                    | 2 × 1.814 |
| Ti1-O2                                                    | 2 × 1.920 | Ti1-O6                                                    | 2 × 1.917 |
| Ti1-O3                                                    | 2 × 2.046 | Ti1-O1                                                    | 2 × 1.932 |
| Ti2-O4                                                    | 1.725     | Ti2-O3                                                    | 1.642     |
| Ti2-O6                                                    | 1.732     | Ti2-O4                                                    | 2 × 1.918 |
| Ti2-O5                                                    | 2 × 1.959 | Ti2-O2                                                    | 2 × 1.957 |
| Ti2-O3                                                    | 2.156     | Ti2-O5                                                    | 2.143     |
| Ti2-O4                                                    | 2.271     | La-O2                                                     | 2 × 2.464 |
| La-O5                                                     | 2.367     | La-O4                                                     | 2 × 2.629 |
| La-O4                                                     | 2 × 2.442 | La-O5                                                     | 4 × 2.736 |
| La-O3                                                     | 2 × 2.557 | La-O1                                                     | 2 × 2.841 |
| La-O5                                                     | 2.785     | La-O6                                                     | 2 × 2.851 |
| La-O1                                                     | 2.834     | Ba-O3                                                     | 2 × 2.830 |
| La-O2                                                     | 2 × 2.857 | Ba-O3                                                     | 4 × 2.916 |
| La-O1                                                     | 2 × 2.881 |                                                           |           |
| La-O3                                                     | 2.887     |                                                           |           |
| Ca-O6                                                     | 2.227     |                                                           |           |
| Ca-O6                                                     | 2 × 2.390 |                                                           |           |
| Ca-O5                                                     | 2.810     |                                                           |           |
| Ca-O5                                                     | 2.887     |                                                           |           |
| Ca-O4                                                     | 2 × 3.035 |                                                           |           |
| Ca-O5                                                     | 2 × 3.090 |                                                           |           |

**Table S2.** Cell parameter of ion-exchanged product

|                                                                      | $a/\text{\AA}$ | $b/\text{\AA}$ | $c/\text{\AA}$ | $V/\text{\AA}^3$ | <i>Space group</i> |
|----------------------------------------------------------------------|----------------|----------------|----------------|------------------|--------------------|
| $\text{CaLa}_2\text{Ti}_3\text{O}_{10}$                              | 3.8989(3)      | 27.908(2)      | 3.7851(2)      | 411.9            | <i>Pnmm</i>        |
| $\text{SrLa}_2\text{Ti}_3\text{O}_{10}$                              | 3.8126(3)      | 28.123(4)      | 3.8724(4)      | 415.2            | <i>C222</i>        |
| $\text{BaLa}_2\text{Ti}_3\text{O}_{10}$                              | 3.8753(1)      | 28.514(2)      | 3.8279(2)      | 423.0            | <i>C222</i>        |
| $\text{Ca}_{0.95}\text{K}_{0.10}\text{La}_2\text{Ti}_3\text{O}_{10}$ | 3.8438(4)      | 28.138(3)      | 3.8669(5)      | 418.2            | <i>Pnmm</i>        |
| $\text{Ca}_{0.89}\text{K}_{0.22}\text{La}_2\text{Ti}_3\text{O}_{10}$ | 3.8763(5)      | 28.455(4)      | 3.8476(6)      | 424.4            | <i>Pnmm</i>        |
| $\text{Ca}_{0.75}\text{K}_{0.50}\text{La}_2\text{Ti}_3\text{O}_{10}$ | 3.8357(6)      | 28.711(5)      | 3.8937(7)      | 428.8            | <i>Pnmm</i>        |

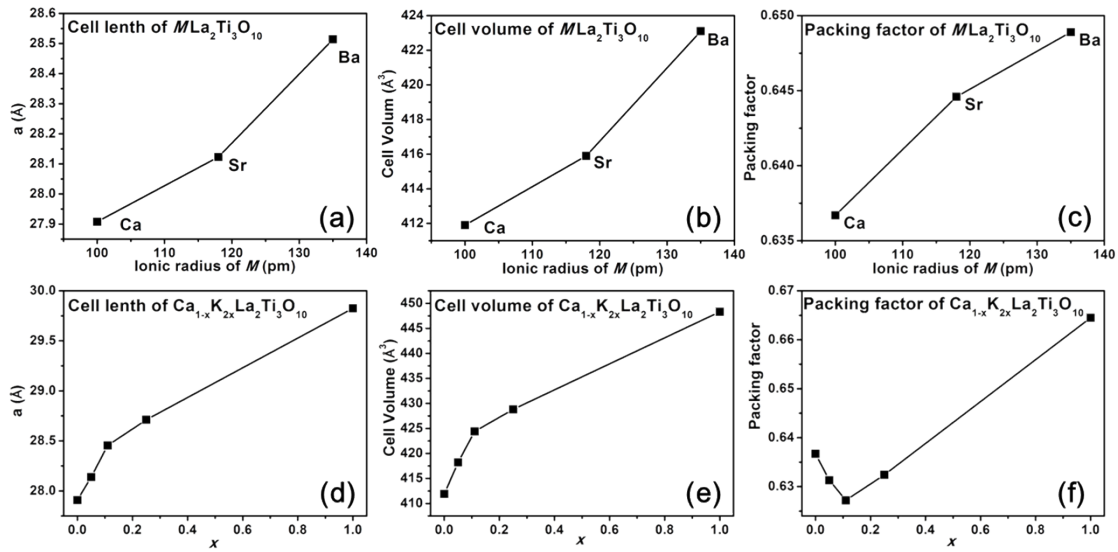

**Figure S1.** Longest cell parameter (in the direction perpendicular to the perovskite layer) of (a)  $\text{MLa}_2\text{Ti}_3\text{O}_{10}$  and (d)  $\text{K}_x\text{Ca}_{1-x}\text{La}_2\text{Ti}_3\text{O}_{10}$ . Cell volume of (b)  $\text{MLa}_2\text{Ti}_3\text{O}_{10}$  and (e)  $\text{K}_x\text{Ca}_{1-x}\text{La}_2\text{Ti}_3\text{O}_{10}$ . Packing factor of (c)  $\text{MLa}_2\text{Ti}_3\text{O}_{10}$  and (f)  $\text{K}_x\text{Ca}_{1-x}\text{La}_2\text{Ti}_3\text{O}_{10}$ .

## Photoluminescence spectra

The PL spectra of  $M\text{La}_2\text{Ti}_3\text{O}_{10}$  ( $M = \text{K}_2, \text{Ca}, \text{Sr}, \text{Ba}$ ) and  $\text{K}_{2-x}\text{Ca}_{1-x}\text{La}_2\text{Ti}_3\text{O}_{10}$  ( $x = 0, 0.05, 0.11, 0.25, 1$ ) were recorded with an excitation wavelength of 205 nm. All the compounds show complex broad emission spectra (360-600nm) with the maximum around 380nm (Figure S2). This result indicates that the energy structures of photo-excitation and relaxation for these layered perovskite are similar. This broad band is assigned to charge transfer emission which directly related to the separation and recombination situation of photo-induced charge carriers. The sharp peak around 470nm was assigned to excitonic PL signal, which related to defects, surface state, etc.<sup>1-3</sup> The ion-exchanged product showed a lower photo luminescent intensity than the original  $\text{K}_2\text{La}_2\text{Ti}_3\text{O}_{10}$ . The result agreed well with the photocatalytic activity. The orderly different PL intensities indicate that the differences in photocatalytic activities of  $\text{K}_{2-x}\text{M}_{1-x}\text{La}_2\text{Ti}_3\text{O}_{10}$  series is related with the lifetime of photo-generated electrons and holes, further evidence the intrinsic relation between lower PF and higher photocatalytic activity.

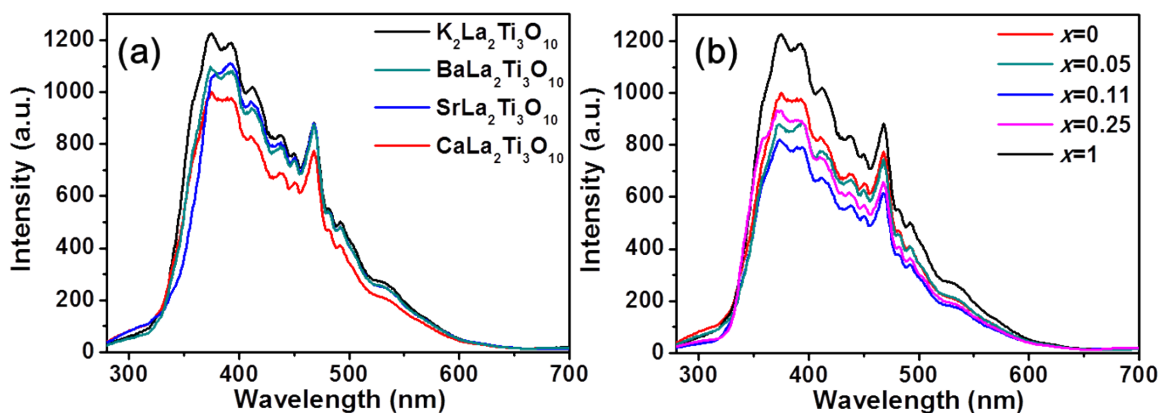

**Figure S2.** Photoluminescence spectra of (a)  $M\text{La}_2\text{Ti}_3\text{O}_{10}$  ( $M = \text{K}_2, \text{Ca}, \text{Sr}, \text{Ba}$ ) and (b)  $\text{K}_{2-x}\text{Ca}_{1-x}\text{La}_2\text{Ti}_3\text{O}_{10}$  ( $x = 0, 0.05, 0.11, 0.25, 1$ ) at room temperature (excitation at 205 nm)

## Reference

1. A. Kudo and T. Sakata, *The Journal of Physical Chemistry*, 1995, **99**, 15963-15967.
2. S. Ida, C. Ogata, M. Eguchi, W. J. Youngblood, T. E. Mallouk and Y. Matsumoto, *J. Am. Chem. Soc.*, 2008, **130**, 7052-7059.
3. J. Liqiang, Q. Yichun, W. Baiqi, L. Shudan, J. Baojiang, Y. Libin, F. Wei, F. Honggang and S. Jiazhong, *Solar Energy Materials and Solar Cells*, 2006, **90**, 1773-1787.
